# Supplementary material for: Rapid preparation of gaseous methanediol (CH2(OH)2)
Source: Royal Society of Chemistry journal article supplement (doi:10.1039/d2cc00964a), 2022-01-01
Supplement: d2cc00964a1.pdf [file d2cc00964a1.pdf]

## Supporting Information

### Rapid preparation of gaseous methanediol

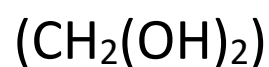

*Yi-Fang Chen and Li-Kang Chu\**

Department of Chemistry, National Tsing Hua University, 101, Sec. 2, Kuang-Fu Rd., Hsinchu  
300044, Taiwan.

## *Table of contents*

### **1. Experimental sections**

#### **1.1. Chemicals**

#### **1.2. Sample preparations**

#### **1.3. Steady-state Fourier-transform infrared spectroscopy**

### **2. Spectral simulation**

### **3. Supplementary figures**

**Fig. S1 Absorption spectra of CH<sub>2</sub>O at different pressures.**

**Fig. S2 The calibrations of the pressures and the integrated absorbances of CH<sub>2</sub>O.**

**Fig. S3 Comparison of the observed infrared spectra of vapours of formaldehyde solution and pure H<sub>2</sub>O.**

## 1. Experimental sections

### 1.1. Chemicals

Paraformaldehyde was purchased from Alfa Aesar (97 %) for use without further purification. Deionized water at a resistivity of 18.2 M $\Omega$ -cm was obtained from a water purification system (SIMS00001, Merck Millipore).

### 1.2. Sample preparations

#### 1.2.1. Formaldehyde solution

The 10 % (w/w) formaldehyde solution was prepared upon dissolving 6.006 g of paraformaldehyde in 54.01 g of water, followed by the reflux at 85 °C for 300 minutes. Then the solution was filtered with a syringe filter (pore size: 0.22  $\mu$ m; diameter: 33 mm, PVDF, All Line Technology). The solution was bathed in *ca.* 32 °C and the vapour was continuously injected to the gas chamber and exhausted to reach the stationary condition. The length and diameter of the cylindrical stainless-steel chamber were 15.0 and 3.7 cm, respectively, and the ends were sealed with two BaF<sub>2</sub> windows (diameter = 25.0 mm, thickness = 3.0 mm, Model No. 87-701, Edmund Optics) to allow the detection region of > 833 cm<sup>-1</sup>. The pressure was read by two capacitance gauges (626C12TBE, 626C11TQE, MKS U.S.A).

#### 1.2.2. CH<sub>2</sub>O vapour

The vapour of CH<sub>2</sub>O was prepared via the pyrolysis of paraformaldehyde at *ca.* 50 °C. By tuning the pumping capacity, the pressure of CH<sub>2</sub>O was adjusted and the infrared spectra were acquired concomitantly, as shown in **Fig. S1**. The calibration of the integrated infrared absorbances at 2682.4 – 2927.5 cm<sup>-1</sup> with respect to the pressures of the pure CH<sub>2</sub>O was also derived, as shown in **Fig. S2**.

#### 1.2.3. H<sub>2</sub>O vapour

The vapour of H<sub>2</sub>O was prepared by evaporating liquid H<sub>2</sub>O in a water bath at *ca.* 35 °C. By tuning the pumping capacity, the pressure of H<sub>2</sub>O was adjusted and the infrared spectrum was acquired

concomitantly. It was used for comparison with the spectrum of the vapour of the formaldehyde solution described in **Section 1.2.1**, as shown in **Fig. S3**. The partial pressure of H<sub>2</sub>O in the vapour from the formaldehyde solution was approximated as 14.3 Torr.

### **1.3 Steady-state Fourier-transform infrared spectroscopy**

The gas chamber was mounted in the absorption compartment of a Fourier-transform infrared spectrometer (Vertex 80, Bruker) operating in continuous-scan mode to collect the infrared absorption spectra of the aforementioned samples in 0–8000 cm<sup>-1</sup> at a spectral resolution of *ca.* 0.4 cm<sup>-1</sup>. Each spectrum was acquired upon averaging 128 scans for a better signal-to-noise ratio.

### **2. Spectral simulation**

The rovibrational contours of the symmetric ( $\nu_s$ ) and antisymmetric ( $\nu_{as}$ ) O–C–O stretching modes of CH<sub>2</sub>(OH)<sub>2</sub> were simulated using the PGOPHER program.<sup>24</sup> The predicted rotational parameters in the vibrational ground and excited states, predicted with the density functional theory B3LYP with the basis set aug-cc-pVTZ for these two vibrational modes, were adapted from Table S12 of Ref. 22. The temperature was set at 298 K and the maximum J quantum number was 100. A linewidth of 0.52 cm<sup>-1</sup> using the Gaussian function was used for constructing the simulated spectrum. Since the predicted infrared intensity is presumably not quantitatively precise, the predicted relative intensity of  $I(\nu_s)/I(\nu_{as})$  of 0.32 was adjusted to 0.54 to better fit the observation, just as previously reported.<sup>22</sup>

### 3. Supplementary figures

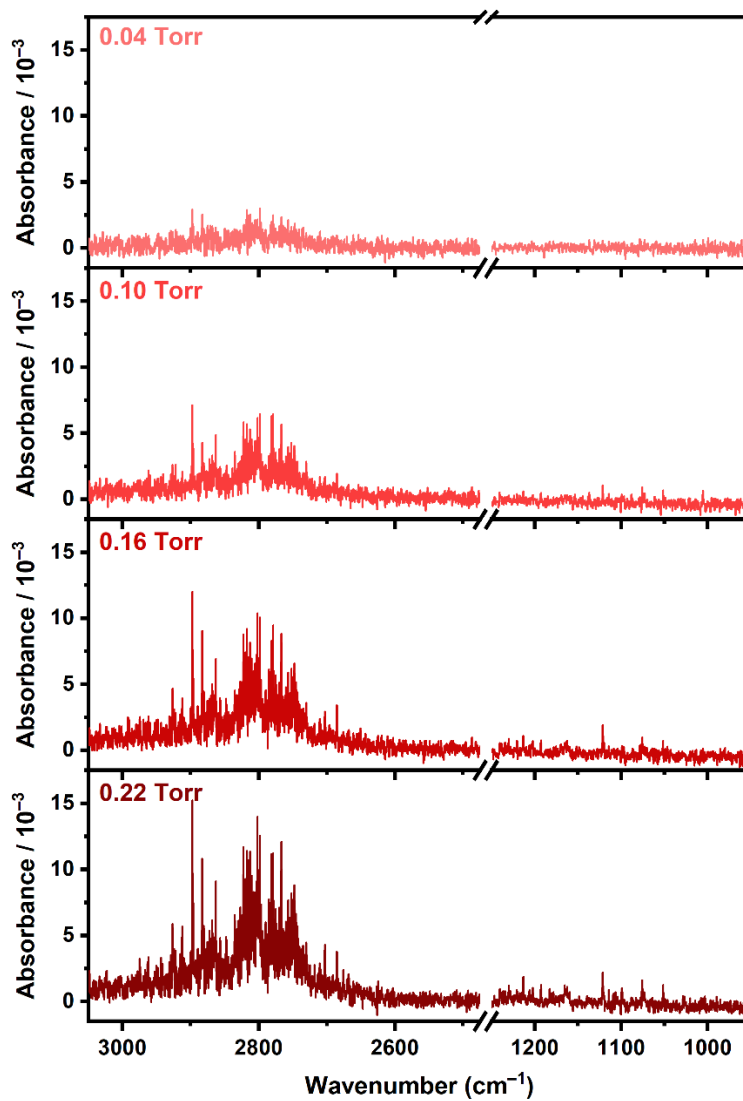

**Fig. S1** Absorption spectra of CH<sub>2</sub>O at different pressures.

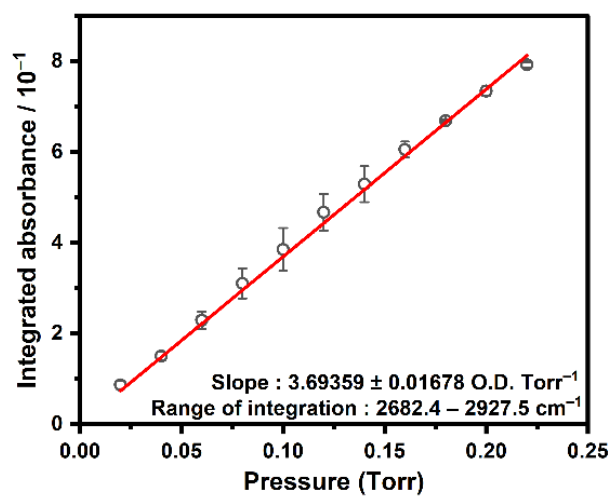

**Fig. S2** The calibrations of the pressures and the integrated absorbances of CH<sub>2</sub>O.

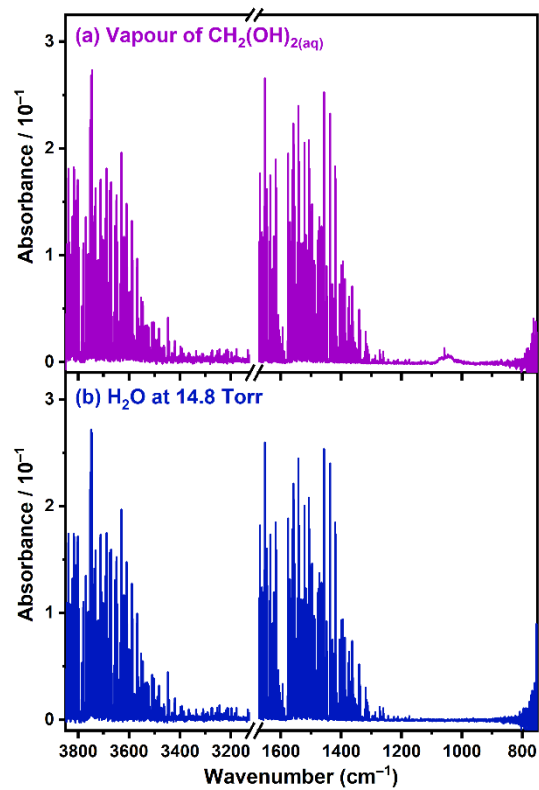

**Fig. S3** Comparison of the observed infrared spectra of (a) vapour of formaldehyde solution (**Fig. 1a**) and (b) pure  $\text{H}_2\text{O}$  pressure at 14.8 Torr.
